# Supplementary material for: Rapid evolution bacteria reveal pathogenic mechanisms and clinical risk
Source: Research Square preprint supplement (doi:10.21203/rs.3.rs-3439730/v1), 2023-11-15
Supplement: Supplementary file 1 [file 7678b2eec35ea024168dd266.docx]

**Extended data**

**Rapid evolution bacteria reveal pathogenic mechanisms and clinical risk**
